# Supplementary material
Source: publisher site journal article supplement (https://oneecosystem.pensoft.net/article/download/suppl/7215223/)
Supplement: Supplementary file 1

**Supplementary Material 1:**

**Grace JB, Steiner M (2021) A protocol for modeling generalized biological responses using latent variables in structural equation models. One Ecosystem.**

**Latent Variable Structural Equation Modeling (LVSEM) Mathematical Notation**

The following is adapted from: Bollen (1989) Structural equations with latent variables. John Wiley & Sons, New York, NY, USA – pp 14 and 20.

Table S1.1. Notation for latent variable structural equation models.

| Relationships among Latent Variables                                                                         |               |                                                                              |
|--------------------------------------------------------------------------------------------------------------|---------------|------------------------------------------------------------------------------|
| $\boldsymbol{\eta} = \mathbf{B}\boldsymbol{\eta} + \boldsymbol{\Gamma}\boldsymbol{\xi} + \boldsymbol{\zeta}$ |               |                                                                              |
| Symbol                                                                                                       | Name          | Definition                                                                   |
| $\eta$                                                                                                       | eta           | latent endogenous variables                                                  |
| $\xi$                                                                                                        | xi            | latent exogenous variables                                                   |
| $\zeta$                                                                                                      | zeta          | errors for endogenous latent variables                                       |
| $\mathbf{B}$                                                                                                 | beta          | coefficient matrix for effects of $\eta$ variables on other $\eta$ variables |
| $\boldsymbol{\Gamma}$                                                                                        | gamma         | coefficient matrix for effects of $\xi$ variables on $\eta$ variables        |
| $\Phi$                                                                                                       | phi           | matrix of covariances among $\xi$ variables                                  |
| $\Psi$                                                                                                       | psi           | matrix of covariances among latent errors, $\zeta$ s                         |
| Relationships between Latent Variables and their Indicator Variables                                         |               |                                                                              |
| $\mathbf{x} = \boldsymbol{\Lambda}_x\boldsymbol{\xi} + \boldsymbol{\delta}$                                  |               |                                                                              |
| $\mathbf{y} = \boldsymbol{\Lambda}_y\boldsymbol{\eta} + \boldsymbol{\varepsilon}$                            |               |                                                                              |
| Symbol                                                                                                       | Name          | Definition                                                                   |
| $\mathbf{x}$                                                                                                 | x             | observed indicators of $\xi$                                                 |
| $\mathbf{y}$                                                                                                 | y             | observed indicators of $\eta$                                                |
| $\boldsymbol{\delta}$                                                                                        | delta         | measurement errors for x variables                                           |
| $\boldsymbol{\varepsilon}$                                                                                   | epsilon       | measurement errors for y variables                                           |
| $\boldsymbol{\Lambda}_x$                                                                                     | lambda x      | coefficients relating exogenous latent variables to their indicators         |
| $\boldsymbol{\Lambda}_y$                                                                                     | lambda y      | coefficients relating endogenous latent variables to their indicators        |
| $\boldsymbol{\Theta}_\delta$                                                                                 | theta-delta   | covariances among errors for x variables                                     |
| $\boldsymbol{\Theta}_\varepsilon$                                                                            | theta-epsilon | covariances among errors for y variables                                     |
